# Supplementary material for: Interaction Effects of Lipoprotein Lipase Polymorphisms with Lifestyle on Lipid Levels in a Korean Population: A Cross-sectional Study
Source: PubMed Central journal article supplement — Genomics Inform. 2012 Jun 30;10(2):88–98. doi: 10.5808/GI.2012.10.2.88 (PMC3480683; doi:10.5808/gi.2012.10.2.88), 2012-06-30
Supplement: gni-10-88-s001.pdf [file gni-10-88-s001.pdf]

## SUPPLEMENTARY INFORMATION

### Interaction Effects of Lipoprotein Lipase Polymorphisms with Lifestyle on Lipid Levels in a Korean Population: A Cross-sectional Study

Jung-A Pyun<sup>1</sup>, Sunshin Kim<sup>1</sup>, KyungChae Park<sup>2</sup>, Inkyung Baik<sup>3</sup>, Nam H Cho<sup>4</sup>, InSong Koh<sup>5</sup>, Jong-Young Lee<sup>6</sup>, Yoon Shin Cho<sup>6</sup>, Young Jin Kim<sup>6</sup>, Min Jin Go<sup>6</sup>, Eugene Shim<sup>7</sup>, KyuBum Kwack<sup>1\*</sup>, Chol Shin<sup>8</sup>

<sup>1</sup>Department of Biomedical Science, College of Life Science, CHA University, Seongnam 463-836, Korea, <sup>2</sup>Department of Family Medicine, CHA Bundang Medical Center, CHA University School of Medicine, Seongnam 463-712, Korea, <sup>3</sup>Department of Foods and Nutrition, College of Natural Sciences, Kookmin University, Seoul 136-702, Korea, <sup>4</sup>Department of Preventive Medicine, Ajou University School of Medicine, Suwon 443-749, Korea, <sup>5</sup>Department of Physiology, Hanyang University College of Medicine, Seoul 133-791, Korea, <sup>6</sup>Center for Genome Science, National Institute of Health, Osong 363-951, Korea, <sup>7</sup>National Hypertension Center, Yonsei University Health System, Seoul 120-752, Korea, <sup>8</sup>Division of Pulmonary and Critical Care Medicine, Department of Internal Medicine, Korea University Ansan Hospital, Korea University College of Medicine, Ansan 425-707, Korea

**Supplementary Table 1.** SNPs associated with lipid concentrations by using stage 1 and imputed data

| Study   | SNP        | Position | Gene       | Function     | Alleles | HDLc                |                        | TG                  |                        | LDLc                |                       | TCHL                |                      |
|---------|------------|----------|------------|--------------|---------|---------------------|------------------------|---------------------|------------------------|---------------------|-----------------------|---------------------|----------------------|
|         |            |          |            |              |         | Effect <sup>a</sup> | p-value <sup>b</sup>   | Effect <sup>a</sup> | p-value <sup>b</sup>   | Effect <sup>a</sup> | p-value <sup>b</sup>  | Effect <sup>a</sup> | p-value <sup>b</sup> |
| Imputed | rs255      | 19811901 | <i>LPL</i> | Intron       | T>C     | 1.25                | $6.80 \times 10^{-11}$ | -8.7                | $1.90 \times 10^{-6}$  | 0.72                | 0.24                  | 0.74                | 0.35                 |
| Imputed | rs256      | 19811967 | <i>LPL</i> | Intron       | C>T     | 1.26                | $3.90 \times 10^{-11}$ | -8.9                | $1.20 \times 10^{-6}$  | 0.7                 | 0.26                  | 0.69                | 0.39                 |
| Stage 1 | rs263      | 19812812 | <i>LPL</i> | Intron       | G>A     | 1.23                | $1.20 \times 10^{-10}$ | -8.8                | $1.70 \times 10^{-6}$  | 0.7                 | 0.26                  | 0.69                | 0.39                 |
| Imputed | rs264      | 19813180 | <i>LPL</i> | Intron       | G>A     | 1.26                | $3.30 \times 10^{-11}$ | -9.0                | $8.90 \times 10^{-7}$  | 0.71                | 0.25                  | 0.7                 | 0.38                 |
| Stage 1 | rs271      | 19813702 | <i>LPL</i> | Intron       | C>T     | 1.27                | $2.50 \times 10^{-11}$ | -9.0                | $7.20 \times 10^{-7}$  | 0.7                 | 0.25                  | 0.69                | 0.39                 |
| Imputed | rs301      | 19816934 | <i>LPL</i> | Intron       | T>C     | 1.38                | $5.20 \times 10^{-12}$ | -9.3                | $7.40 \times 10^{-8}$  | 1.06                | 0.1                   | 0.8                 | 0.28                 |
| Imputed | rs312      | 19817997 | <i>LPL</i> | Intron       | G>C     | 0.37                | 0.25                   | 1.1                 | 0.69                   | -1.45               | 0.13                  | -0.76               | 0.36                 |
| Imputed | rs316      | 19818436 | <i>LPL</i> | Synonymous   | C>A     | 0.43                | 0.18                   | 0.8                 | 0.76                   | -1.22               | 0.2                   | -0.5                | 0.5                  |
| Imputed | rs319      | 19818976 | <i>LPL</i> | Intron       | A>C     | 0.58                | 0.01                   | -1.7                | 0.4                    | 0.51                | 0.53                  | 0.61                | 0.33                 |
| Imputed | rs325      | 19819328 | <i>LPL</i> | Intron       | T>C     | 1.74                | $5.40 \times 10^{-13}$ | -14.8               | $3.20 \times 10^{-12}$ | 2.3                 | $3.70 \times 10^{-3}$ | 1.34                | 0.1                  |
| Imputed | rs327      | 19819536 | <i>LPL</i> | Intron       | A>C     | 1.34                | $1.30 \times 10^{-11}$ | -9.1                | $7.60 \times 10^{-8}$  | 1.11                | 0.08                  | 0.82                | 0.26                 |
| Imputed | rs328      | 19819724 | <i>LPL</i> | Nonsense     | C>G     | 1.75                | $4.60 \times 10^{-13}$ | -14.8               | $3.60 \times 10^{-12}$ | 2.34                | $3.20 \times 10^{-3}$ | 1.39                | 0.09                 |
| Imputed | rs330      | 19820396 | <i>LPL</i> | Intron       | G>A     | 0.43                | 0.18                   | 0.6                 | 0.88                   | -1.14               | 0.22                  | -0.48               | 0.49                 |
| Imputed | rs331      | 19820405 | <i>LPL</i> | Intron       | G>A     | 1.33                | $1.10 \times 10^{-11}$ | -8.9                | $1.30 \times 10^{-7}$  | 1.1                 | 0.08                  | 0.83                | 0.25                 |
| Imputed | rs12679834 | 19820433 | <i>LPL</i> | Intron       | T>C     | 1.73                | $6.10 \times 10^{-13}$ | -14.5               | $9.90 \times 10^{-12}$ | 2.33                | $3.20 \times 10^{-3}$ | 1.39                | 0.09                 |
| Imputed | rs10099160 | 19821815 | <i>LPL</i> | Intron       | T>G     | 0.59                | $9.60 \times 10^{-3}$  | -1.8                | 0.37                   | 0.6                 | 0.45                  | 0.71                | 0.28                 |
| Imputed | rs11570891 | 19822810 | <i>LPL</i> | Intron       | C>T     | 1.84                | $3.20 \times 10^{-14}$ | -14.9               | $1.20 \times 10^{-12}$ | 2.33                | $2.90 \times 10^{-3}$ | 1.43                | 0.08                 |
| Imputed | rs4922115  | 19822830 | <i>LPL</i> | 3' UTR       | G>A     | 0.42                | 0.19                   | 0.9                 | 0.81                   | -1.22               | 0.18                  | -0.55               | 0.45                 |
| Stage 1 | rs11570892 | 19823617 | <i>LPL</i> | 3' UTR       | T>C     | 0.45                | 0.17                   | 1.3                 | 0.63                   | -1.59               | 0.09                  | -0.78               | 0.37                 |
| Imputed | rs3735964  | 19824045 | <i>LPL</i> | 3' UTR       | C>A     | 1.84                | $1.70 \times 10^{-14}$ | -14.6               | $3.70 \times 10^{-12}$ | 2.34                | $2.50 \times 10^{-3}$ | 1.52                | 0.06                 |
| Stage 1 | rs3200218  | 19824071 | <i>LPL</i> | 3' UTR       | T>C     | 0.45                | 0.03                   | -2.0                | 0.44                   | 0.8                 | 0.31                  | 0.76                | 0.26                 |
| Imputed | rs13702    | 19824492 | <i>LPL</i> | 3' UTR       | T>C     | 1.42                | $3.60 \times 10^{-13}$ | -9.2                | $3.60 \times 10^{-8}$  | 1.01                | 0.11                  | 0.8                 | 0.27                 |
| Imputed | rs1059611  | 19824563 | <i>LPL</i> | 3' UTR       | T>C     | 1.84                | $1.20 \times 10^{-14}$ | -14.7               | $2.90 \times 10^{-12}$ | 2.35                | $2.40 \times 10^{-3}$ | 1.53                | 0.06                 |
| Imputed | rs3916027  | 19824868 | -          | Near gene 3' | G>A     | 1.42                | $3.50 \times 10^{-13}$ | -9.3                | $3.20 \times 10^{-8}$  | 1.04                | 0.1                   | 0.81                | 0.26                 |

|         |            |          |   |              |     |      |                        |       |                        |       |                       |       |      |
|---------|------------|----------|---|--------------|-----|------|------------------------|-------|------------------------|-------|-----------------------|-------|------|
| Imputed | rs4921684  | 19825128 | - | Near gene 3' | C>T | 0.43 | 0.18                   | 1.0   | 0.79                   | -1.18 | 0.2                   | -0.5  | 0.49 |
| Imputed | rs2197089  | 19826373 | - | Near gene 3' | G>A | 1.31 | $3.90 \times 10^{-15}$ | -8.3  | $5.60 \times 10^{-8}$  | 1.18  | 0.03                  | 0.96  | 0.08 |
| Imputed | rs10105606 | 19827848 | - | Near gene 3' | C>A | 1.45 | $8.10 \times 10^{-14}$ | -9.5  | $1.30 \times 10^{-8}$  | 1.07  | 0.09                  | 0.84  | 0.23 |
| Stage 1 | rs2410616  | 19828679 | - | Near gene 3' | G>A | 0.4  | 0.19                   | 1.1   | 0.72                   | -0.99 | 0.27                  | -0.34 | 0.6  |
| Imputed | rs2410617  | 19828893 | - | Near gene 3' | T>A | 0.46 | 0.14                   | 0.2   | 0.98                   | -0.92 | 0.32                  | -0.29 | 0.64 |
| Imputed | rs1561750  | 19830766 | - | Intergenic   | T>C | 0.39 | 0.21                   | -0.5  | 0.87                   | -1.05 | 0.26                  | -0.5  | 0.57 |
| Imputed | rs1011685  | 19830769 | - | Intergenic   | C>T | 1.95 | $2.20 \times 10^{-16}$ | -14.9 | $4.60 \times 10^{-13}$ | 2.41  | $1.70 \times 10^{-3}$ | 1.69  | 0.04 |
| Imputed | rs10096633 | 19830921 | - | Intergenic   | C>T | 1.9  | $6.40 \times 10^{-16}$ | -15.0 | $3.80 \times 10^{-13}$ | 2.28  | $2.70 \times 10^{-3}$ | 1.5   | 0.06 |
| Imputed | rs1372339  | 19831798 | - | Intergenic   | A>G | 0.37 | 0.23                   | -0.5  | 0.89                   | -0.93 | 0.31                  | -0.42 | 0.62 |
| Imputed | rs17091872 | 19831977 | - | Intergenic   | G>A | 0.37 | 0.23                   | -0.5  | 0.89                   | -0.93 | 0.31                  | -0.42 | 0.62 |
| Stage 1 | rs17482753 | 19832646 | - | Intergenic   | G>T | 1.88 | $1.10 \times 10^{-15}$ | -14.8 | $6.00 \times 10^{-13}$ | 2.26  | $2.90 \times 10^{-3}$ | 1.49  | 0.06 |
| Imputed | rs4922116  | 19832778 | - | Intergenic   | G>A | 0.37 | 0.23                   | -0.5  | 0.89                   | -0.93 | 0.31                  | -0.42 | 0.62 |
| Imputed | rs1441777  | 19833571 | - | Intergenic   | T>C | 0.37 | 0.23                   | -0.5  | 0.89                   | -0.94 | 0.31                  | -0.42 | 0.61 |
| Imputed | rs10097668 | 19833729 | - | Intergenic   | T>C | 0.64 | $5.70 \times 10^{-3}$  | -2.2  | 0.31                   | 0.41  | 0.61                  | 0.53  | 0.39 |
| Imputed | rs17091891 | 19843171 | - | Intergenic   | T>C | 1.89 | $7.40 \times 10^{-16}$ | -14.9 | $4.10 \times 10^{-13}$ | 2.22  | $3.40 \times 10^{-3}$ | 1.45  | 0.07 |
| Imputed | rs12678919 | 19844222 | - | Intergenic   | A>G | 1.94 | $4.20 \times 10^{-16}$ | -14.8 | $6.20 \times 10^{-13}$ | 2.33  | $2.40 \times 10^{-3}$ | 1.61  | 0.05 |
| Imputed | rs7819706  | 19844415 | - | Intergenic   | A>G | 1.89 | $7.30 \times 10^{-16}$ | -15.0 | $2.50 \times 10^{-13}$ | 2.26  | $2.90 \times 10^{-3}$ | 1.46  | 0.06 |
| Imputed | rs7841189  | 19845376 | - | Intergenic   | C>T | 1.89 | $6.90 \times 10^{-16}$ | -15.1 | $2.30 \times 10^{-13}$ | 2.26  | $2.90 \times 10^{-3}$ | 1.46  | 0.06 |
| Stage 1 | rs12545984 | 19847259 | - | Intergenic   | G>A | 0.33 | 0.28                   | -0.7  | 0.91                   | -0.97 | 0.29                  | -0.5  | 0.58 |
| Stage 1 | rs10503669 | 19847690 | - | Intergenic   | G>T | 1.89 | $2.00 \times 10^{-15}$ | -14.9 | $4.60 \times 10^{-13}$ | 2.07  | $7.00 \times 10^{-3}$ | 1.26  | 0.11 |
| Stage 1 | rs17410962 | 19848080 | - | Intergenic   | G>A | 1.88 | $1.00 \times 10^{-15}$ | -15.0 | $2.80 \times 10^{-13}$ | 2.25  | $3.00 \times 10^{-3}$ | 1.45  | 0.07 |
| Imputed | rs17091905 | 19849757 | - | Intergenic   | G>A | 1.89 | $7.90 \times 10^{-16}$ | -15.1 | $2.10 \times 10^{-13}$ | 2.24  | $3.20 \times 10^{-3}$ | 1.43  | 0.07 |
| Stage 1 | rs17411031 | 19852310 | - | Intergenic   | C>G | 1.42 | $2.10 \times 10^{-13}$ | -10.3 | $4.50 \times 10^{-9}$  | 0.96  | 0.12                  | 0.67  | 0.31 |
| Stage 1 | rs17489282 | 19852518 | - | Intergenic   | G>A | 1.38 | $8.80 \times 10^{-13}$ | -10.1 | $9.60 \times 10^{-9}$  | 0.94  | 0.13                  | 0.61  | 0.35 |
| Stage 1 | rs4922117  | 19852586 | - | Intergenic   | A>G | 1.42 | $2.50 \times 10^{-13}$ | -10.1 | $6.80 \times 10^{-9}$  | 0.88  | 0.16                  | 0.62  | 0.36 |
| Imputed | rs1372345  | 19852948 | - | Intergenic   | C>A | 0.26 | 0.42                   | -0.2  | 0.79                   | -1    | 0.28                  | -0.5  | 0.56 |
| Imputed | rs2410618  | 19853500 | - | Intergenic   | G>A | 1.4  | $4.10 \times 10^{-13}$ | -10.2 | $5.30 \times 10^{-9}$  | 0.98  | 0.11                  | 0.68  | 0.31 |

|         |            |          |   |            |     |      |                        |       |                        |      |                       |      |      |
|---------|------------|----------|---|------------|-----|------|------------------------|-------|------------------------|------|-----------------------|------|------|
| Imputed | rs2410620  | 19854660 | - | Intergenic | C>T | 1.4  | $4.10 \times 10^{-13}$ | -10.2 | $5.30 \times 10^{-9}$  | 0.98 | 0.11                  | 0.68 | 0.31 |
| Imputed | rs2410621  | 19854682 | - | Intergenic | T>C | 1.4  | $4.10 \times 10^{-13}$ | -10.2 | $5.30 \times 10^{-9}$  | 0.98 | 0.11                  | 0.68 | 0.31 |
| Imputed | rs2410623  | 19854889 | - | Intergenic | A>G | 1.4  | $4.70 \times 10^{-13}$ | -10.2 | $7.30 \times 10^{-9}$  | 1.04 | 0.09                  | 0.74 | 0.26 |
| Stage 1 | rs17411126 | 19855272 | - | Intergenic | T>C | 1.41 | $2.90 \times 10^{-13}$ | -10.3 | $5.10 \times 10^{-9}$  | 1.01 | 0.1                   | 0.71 | 0.29 |
| Imputed | rs2165558  | 19856260 | - | Intergenic | T>G | 1.39 | $1.80 \times 10^{-12}$ | -10.6 | $4.70 \times 10^{-9}$  | 1.07 | 0.09                  | 0.72 | 0.28 |
| Imputed | rs4523270  | 19856539 | - | Intergenic | T>C | 1.41 | $3.50 \times 10^{-13}$ | -10.2 | $6.00 \times 10^{-9}$  | 1.05 | 0.09                  | 0.74 | 0.26 |
| Imputed | rs2103325  | 19858343 | - | Intergenic | C>T | 1.41 | $3.20 \times 10^{-13}$ | -10.2 | $6.00 \times 10^{-9}$  | 1.05 | 0.09                  | 0.74 | 0.26 |
| Imputed | rs1581675  | 19858499 | - | Intergenic | T>A | 1.34 | $2.40 \times 10^{-11}$ | -9.9  | $7.00 \times 10^{-8}$  | 0.72 | 0.26                  | 0.39 | 0.56 |
| Imputed | rs2119690  | 19859539 | - | Intergenic | G>A | 1.41 | $3.40 \times 10^{-13}$ | -10.0 | $8.00 \times 10^{-9}$  | 1.06 | 0.09                  | 0.77 | 0.25 |
| Imputed | rs2165556  | 19859627 | - | Intergenic | C>T | 1.41 | $3.40 \times 10^{-13}$ | -10.0 | $8.00 \times 10^{-9}$  | 1.06 | 0.09                  | 0.76 | 0.25 |
| Imputed | rs12541912 | 19859791 | - | Intergenic | G>C | 1.41 | $3.40 \times 10^{-13}$ | -10.0 | $8.00 \times 10^{-9}$  | 1.06 | 0.09                  | 0.76 | 0.25 |
| Imputed | rs4083261  | 19861226 | - | Intergenic | T>C | 1.4  | $4.90 \times 10^{-13}$ | -10.0 | $8.80 \times 10^{-9}$  | 1.08 | 0.08                  | 0.78 | 0.24 |
| Imputed | rs1441766  | 19862788 | - | Intergenic | A>T | 1.4  | $4.10 \times 10^{-13}$ | -10.0 | $7.50 \times 10^{-9}$  | 1.08 | 0.08                  | 0.77 | 0.24 |
| Imputed | rs6999813  | 19863471 | - | Intergenic | T>A | 1.91 | $1.90 \times 10^{-15}$ | -14.7 | $1.70 \times 10^{-12}$ | 2.54 | $1.10 \times 10^{-3}$ | 1.75 | 0.03 |
| Imputed | rs2119689  | 19863507 | - | Intergenic | C>T | 1.4  | $4.20 \times 10^{-13}$ | -10.1 | $6.60 \times 10^{-9}$  | 1.11 | 0.07                  | 0.79 | 0.23 |
| Imputed | rs1441762  | 19864687 | - | Intergenic | G>A | 1.4  | $4.60 \times 10^{-13}$ | -10.1 | $6.40 \times 10^{-9}$  | 1.12 | 0.07                  | 0.8  | 0.23 |
| Imputed | rs2083637  | 19865175 | - | Intergenic | A>G | 1.41 | $3.40 \times 10^{-13}$ | -10.1 | $5.50 \times 10^{-9}$  | 1.11 | 0.07                  | 0.79 | 0.23 |
| Imputed | rs2083636  | 19865263 | - | Intergenic | T>G | 1.4  | $3.40 \times 10^{-13}$ | -10.1 | $5.40 \times 10^{-9}$  | 1.11 | 0.07                  | 0.79 | 0.23 |
| Imputed | rs894211   | 19865747 | - | Intergenic | C>T | 1.39 | $5.70 \times 10^{-13}$ | -9.9  | $6.20 \times 10^{-9}$  | 1.08 | 0.08                  | 0.73 | 0.27 |
| Stage 1 | rs765547   | 19866274 | - | Intergenic | C>T | 1.41 | $3.20 \times 10^{-13}$ | -10.0 | $4.10 \times 10^{-9}$  | 1.15 | 0.06                  | 0.8  | 0.23 |
| Imputed | rs765548   | 19866594 | - | Intergenic | C>T | 1.39 | $5.60 \times 10^{-13}$ | -9.9  | $5.90 \times 10^{-9}$  | 1.07 | 0.08                  | 0.73 | 0.27 |
| Imputed | rs9644637  | 19867220 | - | Intergenic | T>C | 1.39 | $5.60 \times 10^{-13}$ | -9.9  | $5.90 \times 10^{-9}$  | 1.07 | 0.08                  | 0.73 | 0.27 |
| Stage 1 | rs11986942 | 19867445 | - | Intergenic | G>C | 1.39 | $6.20 \times 10^{-13}$ | -9.9  | $6.80 \times 10^{-9}$  | 1.04 | 0.09                  | 0.7  | 0.29 |
| Stage 1 | rs1837842  | 19868290 | - | Intergenic | T>C | 1.39 | $5.40 \times 10^{-13}$ | -9.7  | $8.10 \times 10^{-9}$  | 1.03 | 0.1                   | 0.7  | 0.29 |
| Imputed | rs1441756  | 19868386 | - | Intergenic | A>C | 1.39 | $5.50 \times 10^{-13}$ | -9.9  | $5.80 \times 10^{-9}$  | 1.08 | 0.08                  | 0.74 | 0.27 |
| Imputed | rs4406409  | 19868971 | - | Intergenic | T>C | 1.39 | $6.20 \times 10^{-13}$ | -9.9  | $6.30 \times 10^{-9}$  | 1.07 | 0.08                  | 0.73 | 0.28 |
| Stage 1 | rs1919484  | 19869676 | - | Intergenic | C>T | 1.39 | $6.90 \times 10^{-13}$ | -9.9  | $6.30 \times 10^{-9}$  | 1.07 | 0.08                  | 0.73 | 0.27 |

|         |            |          |   |            |     |      |                        |       |                        |       |                       |       |      |
|---------|------------|----------|---|------------|-----|------|------------------------|-------|------------------------|-------|-----------------------|-------|------|
| Imputed | rs1569213  | 19870735 | - | Intergenic | G>A | 1.42 | $3.40 \times 10^{-13}$ | -10.7 | $2.10 \times 10^{-9}$  | 1.11  | 0.08                  | 0.73  | 0.28 |
| Imputed | rs1372343  | 19871320 | - | Intergenic | C>T | 1.38 | $7.10 \times 10^{-13}$ | -9.7  | $1.30 \times 10^{-8}$  | 0.94  | 0.13                  | 0.64  | 0.32 |
| Imputed | rs1372340  | 19871372 | - | Intergenic | G>A | 1.38 | $7.10 \times 10^{-13}$ | -9.7  | $1.30 \times 10^{-8}$  | 0.94  | 0.13                  | 0.64  | 0.32 |
| Imputed | rs2410626  | 19871487 | - | Intergenic | C>G | 0.36 | 0.25                   | 0.2   | 0.89                   | -1.47 | 0.13                  | -0.92 | 0.34 |
| Imputed | rs2410627  | 19871513 | - | Intergenic | T>C | 1.38 | $7.10 \times 10^{-13}$ | -9.7  | $1.30 \times 10^{-8}$  | 0.94  | 0.13                  | 0.64  | 0.32 |
| Stage 1 | rs7461115  | 19871540 | - | Intergenic | G>C | 1.39 | $7.20 \times 10^{-13}$ | -9.7  | $1.40 \times 10^{-8}$  | 0.96  | 0.12                  | 0.66  | 0.3  |
| Imputed | rs2898494  | 19871580 | - | Intergenic | C>G | 0.36 | 0.25                   | 0.2   | 0.89                   | -1.47 | 0.13                  | -0.92 | 0.34 |
| Imputed | rs2410629  | 19871637 | - | Intergenic | T>C | 1.39 | $6.70 \times 10^{-13}$ | -9.7  | $1.30 \times 10^{-8}$  | 0.95  | 0.13                  | 0.64  | 0.32 |
| Imputed | rs2898495  | 19871892 | - | Intergenic | A>G | 1.42 | $2.30 \times 10^{-13}$ | -10.0 | $5.30 \times 10^{-9}$  | 0.99  | 0.11                  | 0.68  | 0.28 |
| Imputed | rs4593558  | 19872008 | - | Intergenic | A>G | 1.42 | $2.30 \times 10^{-13}$ | -10.0 | $5.30 \times 10^{-9}$  | 0.99  | 0.11                  | 0.68  | 0.28 |
| Imputed | rs6986010  | 19872780 | - | Intergenic | T>C | 1.42 | $2.30 \times 10^{-13}$ | -10.0 | $5.30 \times 10^{-9}$  | 0.99  | 0.11                  | 0.68  | 0.28 |
| Imputed | rs17489539 | 19873582 | - | Intergenic | T>A | 1.42 | $2.30 \times 10^{-13}$ | -10.0 | $5.30 \times 10^{-9}$  | 0.99  | 0.11                  | 0.68  | 0.28 |
| Imputed | rs4922119  | 19874153 | - | Intergenic | C>T | 1.42 | $2.30 \times 10^{-13}$ | -10.0 | $5.30 \times 10^{-9}$  | 0.99  | 0.11                  | 0.68  | 0.28 |
| Imputed | rs4375019  | 19874498 | - | Intergenic | T>A | 1.42 | $2.30 \times 10^{-13}$ | -10.0 | $5.30 \times 10^{-9}$  | 0.99  | 0.11                  | 0.68  | 0.28 |
| Imputed | rs4333617  | 19875004 | - | Intergenic | A>G | 1.41 | $2.90 \times 10^{-13}$ | -10.0 | $5.40 \times 10^{-9}$  | 0.98  | 0.12                  | 0.67  | 0.29 |
| Imputed | rs2410630  | 19875100 | - | Intergenic | C>T | 1.41 | $2.90 \times 10^{-13}$ | -10.0 | $5.40 \times 10^{-9}$  | 0.98  | 0.12                  | 0.67  | 0.29 |
| Imputed | rs6586886  | 19875408 | - | Intergenic | G>A | 1.42 | $2.50 \times 10^{-13}$ | -10.0 | $5.30 \times 10^{-9}$  | 0.99  | 0.11                  | 0.68  | 0.28 |
| Imputed | rs4403423  | 19875554 | - | Intergenic | A>G | 0.4  | 0.2                    | 0.1   | 0.87                   | -1.27 | 0.19                  | -0.69 | 0.48 |
| Imputed | rs7016880  | 19876746 | - | Intergenic | G>C | 1.86 | $7.50 \times 10^{-15}$ | -15.1 | $5.20 \times 10^{-13}$ | 2.38  | $2.10 \times 10^{-3}$ | 1.55  | 0.06 |
| Imputed | rs7007609  | 19876797 | - | Intergenic | T>C | 1.86 | $7.50 \times 10^{-15}$ | -15.1 | $5.20 \times 10^{-13}$ | 2.38  | $2.10 \times 10^{-3}$ | 1.55  | 0.06 |
| Imputed | rs7007797  | 19876970 | - | Intergenic | T>G | 1.86 | $7.50 \times 10^{-15}$ | -15.1 | $5.20 \times 10^{-13}$ | 2.38  | $2.10 \times 10^{-3}$ | 1.55  | 0.06 |
| Imputed | rs7004149  | 19877208 | - | Intergenic | A>G | 1.86 | $5.70 \times 10^{-15}$ | -15.1 | $4.30 \times 10^{-13}$ | 2.37  | $2.30 \times 10^{-3}$ | 1.54  | 0.06 |
| Imputed | rs7004158  | 19877233 | - | Intergenic | A>G | 1.86 | $5.70 \times 10^{-15}$ | -15.1 | $4.30 \times 10^{-13}$ | 2.37  | $2.30 \times 10^{-3}$ | 1.54  | 0.06 |
| Imputed | rs6983430  | 19877253 | - | Intergenic | G>C | 1.86 | $5.70 \times 10^{-15}$ | -15.1 | $4.30 \times 10^{-13}$ | 2.37  | $2.30 \times 10^{-3}$ | 1.54  | 0.06 |
| Imputed | rs12678603 | 19877732 | - | Intergenic | C>T | 1.85 | $7.30 \times 10^{-15}$ | -15.0 | $7.50 \times 10^{-13}$ | 2.39  | $2.00 \times 10^{-3}$ | 1.58  | 0.05 |
| Imputed | rs12678604 | 19877773 | - | Intergenic | C>G | 1.85 | $7.30 \times 10^{-15}$ | -15.0 | $7.50 \times 10^{-13}$ | 2.39  | $2.00 \times 10^{-3}$ | 1.58  | 0.05 |
| Stage 1 | rs7013777  | 19878356 | - | Intergenic | A>G | 1.39 | $4.80 \times 10^{-13}$ | -10.0 | $7.50 \times 10^{-9}$  | 0.93  | 0.13                  | 0.63  | 0.31 |

|         |            |          |   |            |     |      |                        |       |                        |       |                       |       |      |
|---------|------------|----------|---|------------|-----|------|------------------------|-------|------------------------|-------|-----------------------|-------|------|
| Imputed | rs11989309 | 19880330 | - | Intergenic | C>T | 1.88 | $7.80 \times 10^{-15}$ | -15.0 | $1.00 \times 10^{-12}$ | 2.47  | $1.60 \times 10^{-3}$ | 1.67  | 0.04 |
| Imputed | rs1919485  | 19882721 | - | Intergenic | T>G | 0.33 | 0.29                   | 0.6   | 0.66                   | -1.32 | 0.17                  | -0.67 | 0.49 |
| Imputed | rs7816447  | 19882950 | - | Intergenic | T>C | 1.88 | $8.10 \times 10^{-15}$ | -14.9 | $1.40 \times 10^{-12}$ | 2.44  | $1.80 \times 10^{-3}$ | 1.65  | 0.04 |
| Imputed | rs1919486  | 19883287 | - | Intergenic | A>T | 0.33 | 0.29                   | 0.6   | 0.65                   | -1.32 | 0.17                  | -0.67 | 0.49 |
| Imputed | rs1919487  | 19883530 | - | Intergenic | T>A | 1.38 | $2.80 \times 10^{-12}$ | -9.9  | $1.40 \times 10^{-8}$  | 0.83  | 0.2                   | 0.53  | 0.42 |
| Imputed | rs4543558  | 19888329 | - | Intergenic | C>G | 1.39 | $2.80 \times 10^{-12}$ | -9.9  | $1.50 \times 10^{-8}$  | 0.88  | 0.17                  | 0.6   | 0.37 |
| Imputed | rs2178296  | 19889125 | - | Intergenic | G>T | 1.42 | $8.40 \times 10^{-13}$ | -10.0 | $9.80 \times 10^{-9}$  | 0.86  | 0.18                  | 0.58  | 0.39 |
| Imputed | rs7837677  | 19889872 | - | Intergenic | C>T | 0.39 | 0.2                    | 0.5   | 0.73                   | -1.42 | 0.14                  | -0.75 | 0.44 |
| Imputed | rs4574859  | 19890322 | - | Intergenic | G>A | 0.35 | 0.26                   | 1.2   | 0.63                   | -1.41 | 0.14                  | -0.65 | 0.48 |
| Imputed | rs10103634 | 19890612 | - | Intergenic | G>A | 1.5  | $2.10 \times 10^{-16}$ | -11.7 | $9.00 \times 10^{-13}$ | 1.66  | $5.40 \times 10^{-3}$ | 1     | 0.1  |
| Stage 1 | rs4442164  | 19892181 | - | Intergenic | A>G | 0.23 | 0.52                   | 3.6   | 0.27                   | -1.76 | 0.07                  | -0.87 | 0.35 |
| Stage 1 | rs4244457  | 19899046 | - | Intergenic | C>T | 1.39 | $8.40 \times 10^{-17}$ | -9.6  | $5.70 \times 10^{-10}$ | 0.96  | 0.08                  | 0.75  | 0.2  |
| Imputed | rs2178298  | 19899697 | - | Intergenic | G>T | 0.36 | 0.25                   | 0.3   | 0.67                   | -1.51 | 0.12                  | -0.7  | 0.45 |
| Imputed | rs1406502  | 19902067 | - | Intergenic | C>T | 0.36 | 0.24                   | 0.3   | 0.67                   | -1.51 | 0.12                  | -0.7  | 0.45 |
| Imputed | rs1406501  | 19902177 | - | Intergenic | T>C | 0.32 | 0.31                   | 0.4   | 0.6                    | -1.51 | 0.11                  | -0.69 | 0.45 |
| Imputed | rs2049749  | 19902769 | - | Intergenic | C>A | 0.36 | 0.24                   | 0.3   | 0.67                   | -1.5  | 0.12                  | -0.69 | 0.45 |
| Imputed | rs2178297  | 19902830 | - | Intergenic | G>A | 0.36 | 0.24                   | 0.3   | 0.67                   | -1.5  | 0.12                  | -0.69 | 0.45 |
| Stage 1 | rs4449813  | 19903320 | - | Intergenic | G>A | 0.35 | 0.32                   | 1.3   | 0.62                   | -1.77 | 0.08                  | -0.96 | 0.41 |
| Stage 1 | rs1590120  | 19903355 | - | Intergenic | T>C | 0.34 | 0.26                   | 0.7   | 0.64                   | -1.46 | 0.13                  | -0.67 | 0.46 |
| Imputed | rs1581674  | 19903423 | - | Intergenic | G>T | 0.36 | 0.24                   | 0.3   | 0.67                   | -1.5  | 0.12                  | -0.69 | 0.45 |
| Stage 1 | rs12544475 | 19906693 | - | Intergenic | T>C | 0.35 | 0.27                   | 0.6   | 0.59                   | -1.39 | 0.14                  | -0.59 | 0.49 |
| Imputed | rs7015401  | 19909426 | - | Intergenic | G>T | 0.31 | 0.33                   | 1.0   | 0.5                    | -1.47 | 0.13                  | -0.65 | 0.46 |
| Imputed | rs1569211  | 19914106 | - | Intergenic | C>G | 0.29 | 0.37                   | 1.0   | 0.49                   | -1.5  | 0.12                  | -0.71 | 0.43 |

SNP, single nucleotide polymorphism; HDLC, high density lipoprotein cholesterol; TG, triglyceride; LDLC, low density lipoprotein cholesterol; TCHL, total cholesterol; *LPL*, lipoprotein lipase; UTR, untranslated region.

<sup>a</sup>Unstandardized coefficients of untransformed values (effect). Effect sizes (mg/dL) of minor alleles assessed in an additive manner; <sup>b</sup>p-values of the minor allele (assessed in an additive manner) adjusted for residence area, age, gender and body mass index.

**Supplementary Table 2.** Association of *LPL* SNPs with lipid concentrations at stage 2

| SNP        | Position | Function | Alleles | HDLc                |                       | TG                  |                      | LDLc                 |                      | TCHL                  |                      |
|------------|----------|----------|---------|---------------------|-----------------------|---------------------|----------------------|----------------------|----------------------|-----------------------|----------------------|
|            |          |          |         | Effect <sup>a</sup> | p-value <sup>b</sup>  | Effect <sup>a</sup> | p-value <sup>b</sup> | Effect <sup>a</sup>  | p-value <sup>b</sup> | Effect <sup>a</sup>   | p-value <sup>b</sup> |
| rs343      | 19810787 | Intron   | C>A     | 0.68                | 0.08                  | -7.52               | 0.12                 | 2.16                 | 0.05                 | 1.82                  | 0.11                 |
| rs253      | 19811417 | Intron   | C>T     | 0.85                | $4.2 \times 10^{-3}$  | -7.42               | $3.6 \times 10^{-3}$ | 0.87                 | 0.27                 | 0.59                  | 0.56                 |
| rs263      | 19812812 | Intron   | G>A     | 1.53                | $5.5 \times 10^{-6}$  | -8.58               | $3.3 \times 10^{-3}$ | 1.57                 | 0.09                 | 1.82                  | 0.07                 |
| rs271      | 19813702 | Intron   | C>T     | 1.53                | $5.1 \times 10^{-6}$  | -8.71               | $2.2 \times 10^{-3}$ | 1.51                 | 0.10                 | 1.74                  | 0.08                 |
| rs326      | 19819439 | Intron   | T>C     | 2.05                | $1.5 \times 10^{-9}$  | -12.17              | $9.1 \times 10^{-7}$ | -0.20                | 0.83                 | $-3.7 \times 10^{-3}$ | 0.80                 |
| rs327      | 19819536 | Intron   | A>C     | 2.05                | $1.6 \times 10^{-9}$  | -12.27              | $5.9 \times 10^{-7}$ | -0.30                | 0.74                 | -0.11                 | 0.90                 |
| rs12679834 | 19820433 | Intron   | T>C     | 3.26                | $3.1 \times 10^{-14}$ | -13.70              | $1.3 \times 10^{-6}$ | -0.45                | 0.69                 | 0.72                  | 0.40                 |
| rs11570892 | 19823617 | 3' UTR   | T>C     | -0.03               | 0.92                  | -7.60               | 0.11                 | $9.0 \times 10^{-3}$ | 0.99                 | -1.15                 | 0.48                 |
| rs3200218  | 19824071 | 3' UTR   | T>C     | -0.67               | 0.09                  | -3.81               | 0.25                 | -0.36                | 0.74                 | -1.65                 | 0.13                 |

*LPL*, lipoprotein lipase; SNP, single nucleotide polymorphism; HDLc, high density lipoprotein cholesterol; TG, triglyceride; LDLc, low density lipoprotein cholesterol; TCHL, total cholesterol; UTR, untranslated region.

<sup>a</sup>Unstandardized coefficients of untransformed values (effect). Effect sizes (mg/dL) of minor alleles assessed in an additive manner; <sup>b</sup>p-values of the minor allele (assessed in an additive manner) adjusted for age, gender and body mass index.

**Supplementary Table 3.** Association between haplotypes including *LPL* SNPs and lipid concentrations by using stage 1 and imputed data

| Block | HT               | Haplotype frequency |       |       | HDLC                |                       | TG                  |                       | LDLC                |                      | TCHL                |                      |
|-------|------------------|---------------------|-------|-------|---------------------|-----------------------|---------------------|-----------------------|---------------------|----------------------|---------------------|----------------------|
|       |                  | ++                  | +-    | --    | Effect <sup>a</sup> | p-value <sup>b</sup>  | Effect <sup>a</sup> | p-value <sup>b</sup>  | Effect <sup>a</sup> | p-value <sup>b</sup> | Effect <sup>a</sup> | p-value <sup>b</sup> |
| B1    | HT1: CTAAT       | 356                 | 2,425 | 4,751 | 1.26                | $4.4 \times 10^{-11}$ | -8.99               | $9.2 \times 10^{-7}$  | 0.70                | 0.26                 | 0.67                | 0.40                 |
|       | HT2: TCGGC       | 4,725               | 2,448 | 359   | -1.24               | $8.1 \times 10^{-11}$ | 8.77                | $1.5 \times 10^{-6}$  | -0.72               | 0.24                 | -0.72               | 0.37                 |
| B2    | HT1 <sup>c</sup> | 3,014               | 3,327 | 921   | -1.30               | $4.2 \times 10^{-15}$ | 8.00                | $1.9 \times 10^{-8}$  | -1.22               | 0.02                 | -1.05               | 0.06                 |
|       | HT2 <sup>d</sup> | 68                  | 1,421 | 5,773 | 0.58                | 0.01                  | -3.85               | 0.17                  | 0.95                | 0.26                 | 0.86                | 0.29                 |
|       | HT3 <sup>e</sup> | 104                 | 1,480 | 5,678 | 1.99                | $7.8 \times 10^{-16}$ | -15.07              | $5.6 \times 10^{-13}$ | 2.25                | $5.1 \times 10^{-3}$ | 1.42                | 0.09                 |
|       | HT4 <sup>f</sup> | 2                   | 288   | 6,972 | 0.34                | 0.68                  | -9.42               | 0.15                  | -1.03               | 0.58                 | -1.56               | 0.44                 |
|       | HT5 <sup>g</sup> | 21                  | 836   | 6,405 | 0.19                | 0.62                  | 2.08                | 0.42                  | -0.90               | 0.41                 | -0.31               | 0.92                 |
|       | HT6 <sup>h</sup> | 0                   | 225   | 7,037 | -0.45               | 0.52                  | 11.55               | 0.19                  | 0.70                | 0.74                 | 1.37                | 0.36                 |

*LPL*, lipoprotein lipase; SNP, single nucleotide polymorphism; HT, haplotype; HDLC, high density lipoprotein cholesterol; TG, triglyceride; LDLC, low density lipoprotein cholesterol; TCHL, total cholesterol; B, block.

<sup>a</sup>Unstandardised coefficients of untransformed values (effect). Effect sizes (mg/dL) of haplotypes assessed in an additive manner; <sup>b</sup>p-values of the haplotype (assessed in an additive manner) adjusted for residence area, age, gender and body mass index; <sup>c</sup>Haplotype 1 in block 2:

TGCATACGGTTCGTCTTTGCGCGTTCAGGGTTAACGGGGCGACGCTATTTCTGCGTATCGATCCCTGTATCGCGCTGCTAATTCTACGAGTTAA  
GCCACTTATTCGCGGACGCTCGGTGTGC; <sup>d</sup>Haplotype 2 in block 2:

TGCCTACGGTGCCTTGCACGTTCCAGGGTCTAACGGGGCGACGCTATTTCTGCGTATCGATCCCTGTATCGCGCTGCTAATTCTACGAGTTA  
AGCCACTTATTCGCGAATGCTCGGTGTGC; <sup>e</sup>Haplotype 3 in block 2:

CGCACC GGACTTGTATCCACAAGTTTTAGTGTTTCGGTGTAAAGAGCATCGCGCTAATCCTATAGGTTTCCCCCTATAACCCCGGCATAGTAACCGG  
GCTGGTTCAACGTCGAATGCTCGGTGTGC; <sup>f</sup>Haplotype 4 in block 2:

TGCATACGGTTCGTCTTTGCGCGTTCAGGGTTAACGGGGCGACGCTATTTCTGCGTATCGATCCCTGTATCGCGCTGCTAATTCTACGAGTTAA  
GCCACTTATTCGCGAATGCTCGGTGTGC; <sup>g</sup>Haplotype 5 in block 2:

CCAATCCAATTCACCTCTATAAAACCCGAGACTTAACAGGGGAGAATCGCGCTAATCCTTTAGGTTTCCCCCTATAGCCGCGGCATAGTAGGTTA  
AGCCGCGTTATGTTAGGTTTCAAACCTCTG; <sup>h</sup>Haplotype 6 in block 2:

TGCCTACGGTGCCTTGCACGTTCCAGGGTCTAACGGGGCGACGCTATTTCTGCGTATCGATCCCTGTATCGCGCTGCTAATTCTACGAGTTA  
AGCCACTTATTCGCGGACGCTCGGTGTGC.



**Supplementary Table 4.** Association between haplotypes including *LPL* SNPs and lipid concentrations at stage 1

| Block | HT                    | Haplotype frequency |       |       | HDLC                |                       | TG                  |                       | LDLC                |                      | TCHL                |                      |
|-------|-----------------------|---------------------|-------|-------|---------------------|-----------------------|---------------------|-----------------------|---------------------|----------------------|---------------------|----------------------|
|       |                       | ++                  | +-    | --    | Effect <sup>a</sup> | p-value <sup>b</sup>  | Effect <sup>a</sup> | p-value <sup>b</sup>  | Effect <sup>a</sup> | p-value <sup>b</sup> | Effect <sup>a</sup> | p-value <sup>b</sup> |
| B1    | HT1: AT               | 356                 | 2,426 | 4,754 | 1.25                | $5.2 \times 10^{-11}$ | -8.98               | $9.3 \times 10^{-7}$  | 0.70                | 0.26                 | 0.66                | 0.41                 |
|       | HT2: GC               | 4,725               | 2,451 | 360   | -1.25               | $5.7 \times 10^{-11}$ | 8.81                | $1.3 \times 10^{-6}$  | -0.70               | 0.25                 | -0.72               | 0.37                 |
| B2    | HT1: TGGGGGCGATCGTCGA | 3,258               | 3,408 | 870   | -1.27               | $5.0 \times 10^{-15}$ | 7.88                | $3.4 \times 10^{-8}$  | -1.15               | 0.03                 | -0.94               | 0.08                 |
|       | HT2: CGGGGGCGATCGTCGA | 97                  | 1,623 | 5,816 | 0.42                | 0.04                  | -1.92               | 0.43                  | 0.88                | 0.26                 | 0.81                | 0.24                 |
|       | HT3: TGTGTAGAGCTCCTCG | 119                 | 1,550 | 5,867 | 1.92                | $5.4 \times 10^{-16}$ | -15.02              | $7.3 \times 10^{-13}$ | 2.20                | $4.4 \times 10^{-3}$ | 1.42                | 0.08                 |
|       | HT4: TAGAGGGAGCTCCTCG | 43                  | 1,144 | 6,349 | 0.35                | 0.22                  | -1.00               | 0.95                  | -0.91               | 0.33                 | -0.44               | 0.63                 |

*LPL*, lipoprotein lipase; SNP, single nucleotide polymorphism; HT, haplotype; HDLC, high density lipoprotein cholesterol; TG, triglyceride; LDLC, low density lipoprotein cholesterol; TCHL, total cholesterol; B, block.

<sup>a</sup>Unstandardised coefficients of untransformed values (effect). Effect sizes (mg/dL) of haplotypes assessed in an additive manner; <sup>b</sup>p-values of the haplotype (assessed in an additive manner) adjusted for residence area, age, gender and body mass index.

**Supplemental Table 5.** Association between haplotypes including *LPL* SNPs and lipid concentrations at stage 2

| Block | HT               | Haplotype frequency |       |       | HDLC                |                       | TG                  |                      | LDLC                |                      | TCHL                |                      |
|-------|------------------|---------------------|-------|-------|---------------------|-----------------------|---------------------|----------------------|---------------------|----------------------|---------------------|----------------------|
|       |                  | ++                  | +-    | --    | Effect <sup>a</sup> | p-value <sup>b</sup>  | Effect <sup>a</sup> | p-value <sup>b</sup> | Effect <sup>a</sup> | p-value <sup>b</sup> | Effect <sup>a</sup> | p-value <sup>b</sup> |
| B1    | HT1: ATAT        | 53                  | 851   | 2,799 | 0.77                | 0.05                  | -7.27               | 0.14                 | 2.28                | 0.04                 | 2.08                | 0.08                 |
|       | HT2: CTAT        | 13                  | 504   | 3,186 | 2.37                | $7.1 \times 10^{-6}$  | -8.28               | $7.5 \times 10^{-3}$ | -0.37               | 0.80                 | 0.57                | 0.70                 |
|       | HT3: CTGC        | 50                  | 727   | 2,926 | -0.60               | 0.13                  | -1.92               | 0.66                 | -0.51               | 0.65                 | -1.43               | 0.17                 |
|       | HT4: CCGC        | 1,712               | 1,644 | 347   | -0.85               | $4.1 \times 10^{-3}$  | 7.58                | $2.8 \times 10^{-3}$ | -0.92               | 0.25                 | -0.61               | 0.55                 |
| B2    | HT1 <sup>c</sup> | 36                  | 690   | 2,902 | 3.27                | $1.1 \times 10^{-12}$ | -12.84              | $1.5 \times 10^{-5}$ | -0.55               | 0.65                 | 0.74                | 0.42                 |
|       | HT2 <sup>d</sup> | 1,452               | 1,695 | 481   | -1.39               | $1.9 \times 10^{-6}$  | 10.71               | $1.3 \times 10^{-6}$ | 0.07                | 0.93                 | 0.32                | 0.89                 |
|       | HT3 <sup>e</sup> | 0                   | 87    | 3,541 | -2.77               | 0.05                  | 11.21               | 0.14                 | 2.92                | 0.39                 | 1.86                | 0.62                 |
|       | HT4 <sup>f</sup> | 12                  | 362   | 3,254 | 0.20                | 0.70                  | -9.46               | 0.12                 | 0.76                | 0.64                 | -0.40               | 0.78                 |
|       | HT5 <sup>g</sup> | 2                   | 136   | 3,490 | 1.32                | 0.22                  | -8.71               | 0.40                 | -0.08               | 0.98                 | -0.11               | 0.86                 |
|       | HT6 <sup>h</sup> | 40                  | 680   | 2,908 | -0.33               | 0.37                  | -4.65               | 0.22                 | -0.76               | 0.53                 | -1.95               | 0.10                 |

*LPL*, lipoprotein lipase; SNP, single nucleotide polymorphism; HT, haplotype; HDLC, high density lipoprotein cholesterol; TG, triglyceride; LDLC, low density lipoprotein cholesterol; TCHL, total cholesterol; B, block.

<sup>a</sup>Unstandardised coefficients of untransformed values (effect). Effect sizes (mg/dL) of haplotypes assessed in an additive manner; <sup>b</sup>p-values of the haplotype (assessed in an additive manner) adjusted for age, gender and body mass index; <sup>c</sup>Haplotype 1 in block 2: CCCTTTGTAATGTAAGCAGGCGATCCTCGCGATGT; <sup>d</sup>Haplotype 2 in block 2: TATTCGGAACGGGTGCTGAGTCTCGTCGAGAACGT;

<sup>e</sup>Haplotype 3 in block 2: TATTCTGGAGCGGGTCTGAGTCTCGTCGAGAACGT; <sup>f</sup>Haplotype 4 in block 2: CCTCTTAGGACAGGAGG-CAGTCGATCCTCGGGGTAC; <sup>g</sup>Haplotype 5 in block 2: TATTCGGAACGGGTGCTGAGTCTCGTCGAGAATGT; <sup>h</sup>Haplotype 6 in block 2: TATTCTGGAGCGGGTCTGAGTCTCGTCGAGAATGT.

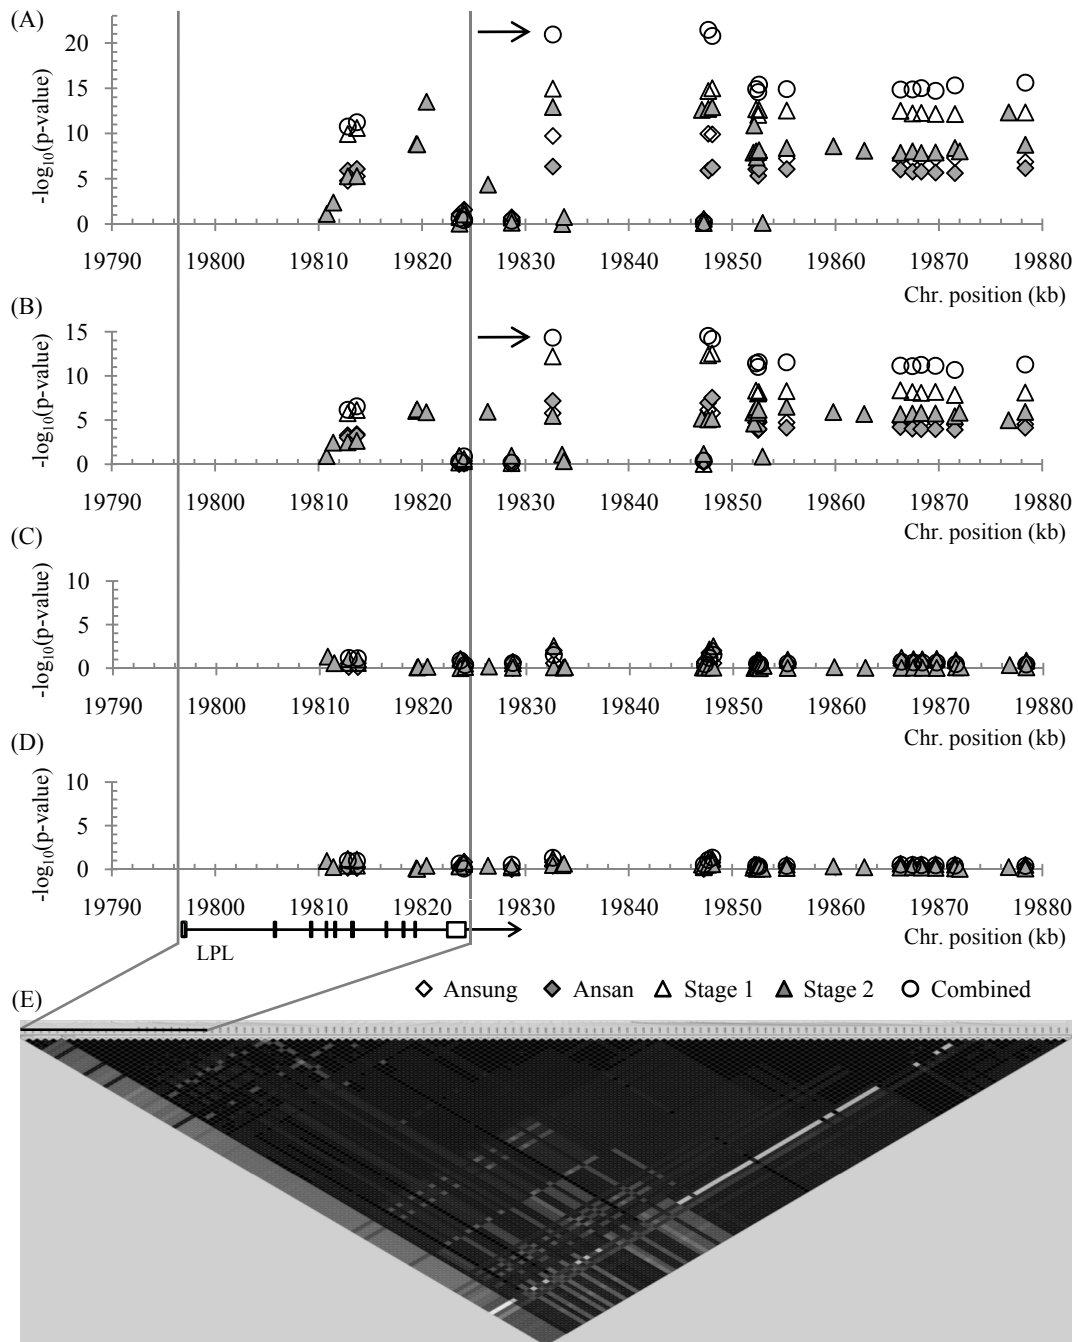

**Supplementary Fig. 1.** (A-E) Plots of association ( $-\log_{10}$  p-value) between single-nucleotide polymorphisms (SNPs) located on lipoprotein lipase (*LPL*) gene including 3' flanking region and lipid traits: (A) high-density lipoprotein cholesterol, (B) triglyceride, (C) low-density lipoprotein cholesterol, (D) total cholesterol. The human *LPL* gene is located from base 19796582 to 19824770 on chromosome 8. The linkage disequilibrium (LD) block partition was performed by using stage 1 and imputed data. A significantly associated SNP marked by an arrow was rs17482753 which is in strong LD with a nonsense SNP, rs328.

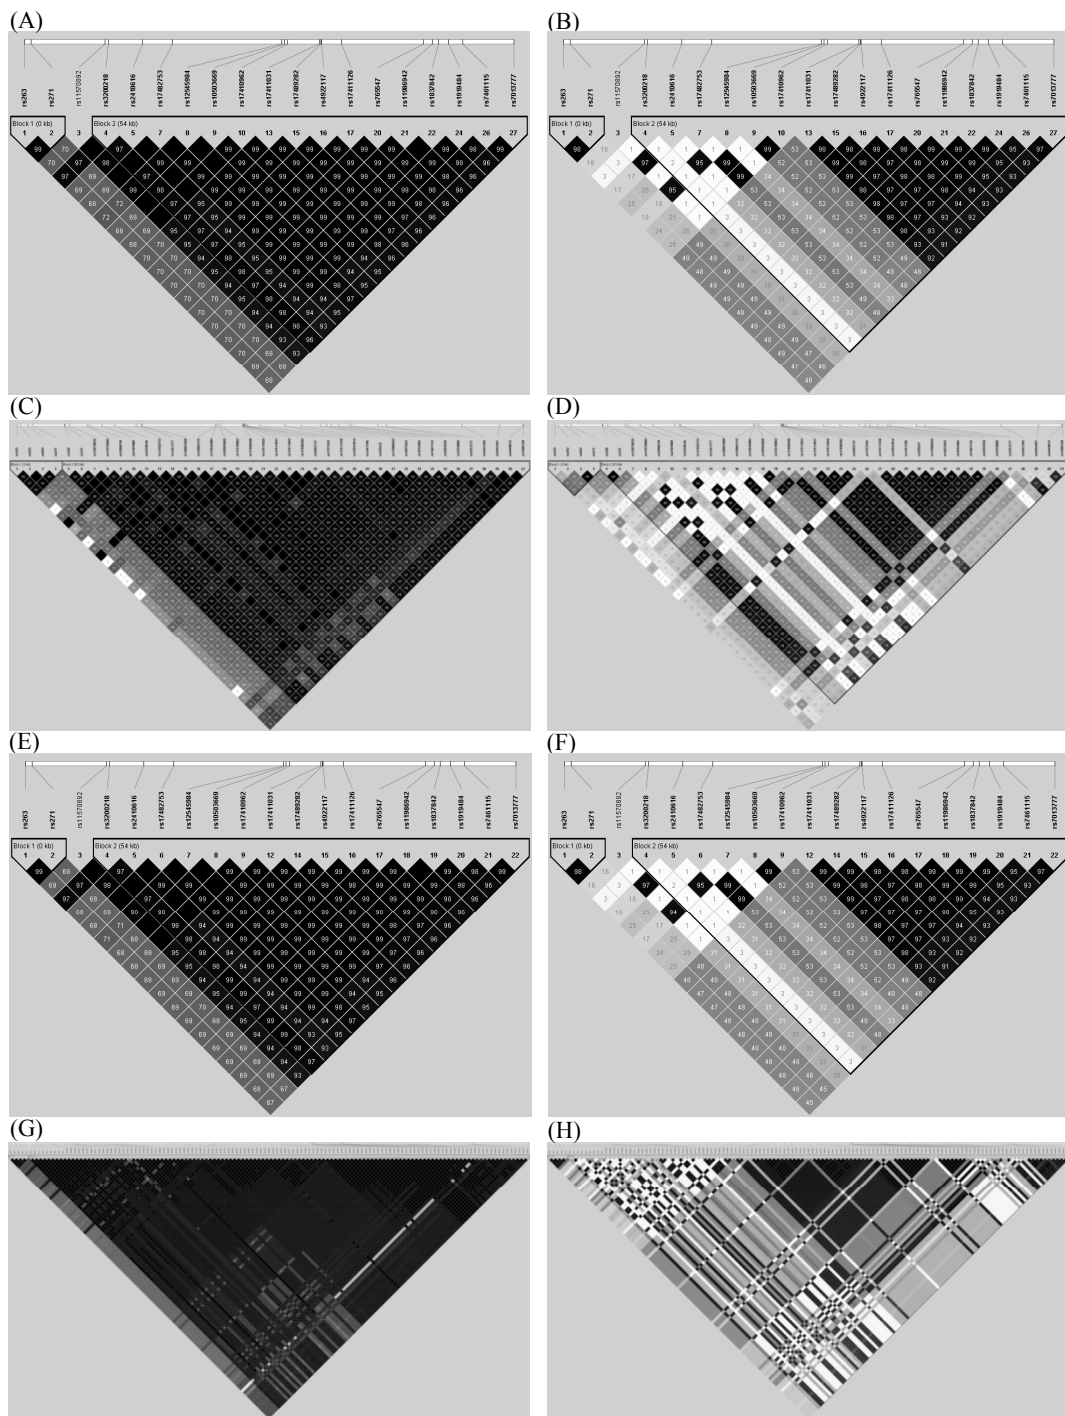

**Supplementary Fig. 2.** Linkage disequilibrium (LD) blocks for the region including lipoprotein lipase (*LPL*) single-nucleotide polymorphisms. (A, C, E, G) LD color by  $|D'|$  values, (B, D, F, H) LD color by  $r^2$  values. (A, B) stage 1, (C, D) stage 2, (E, F) combined data (stage 1 + 2), (G, H) imputed data.

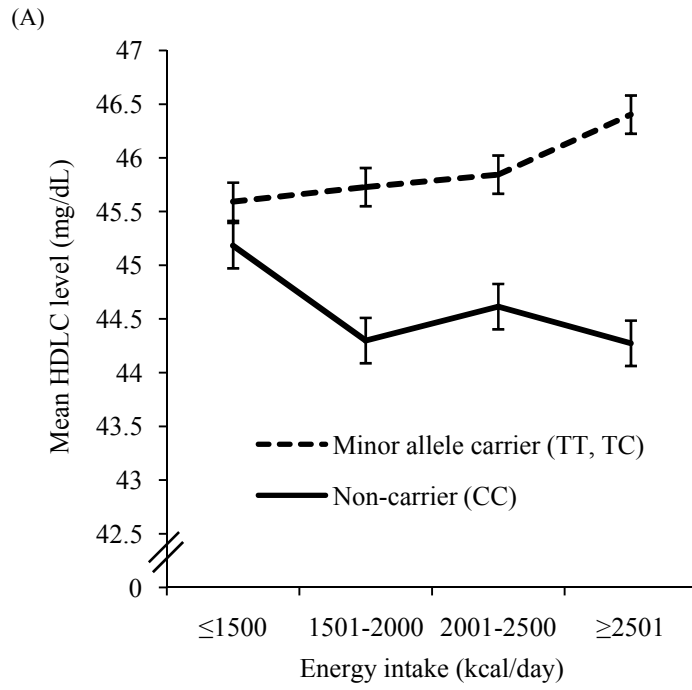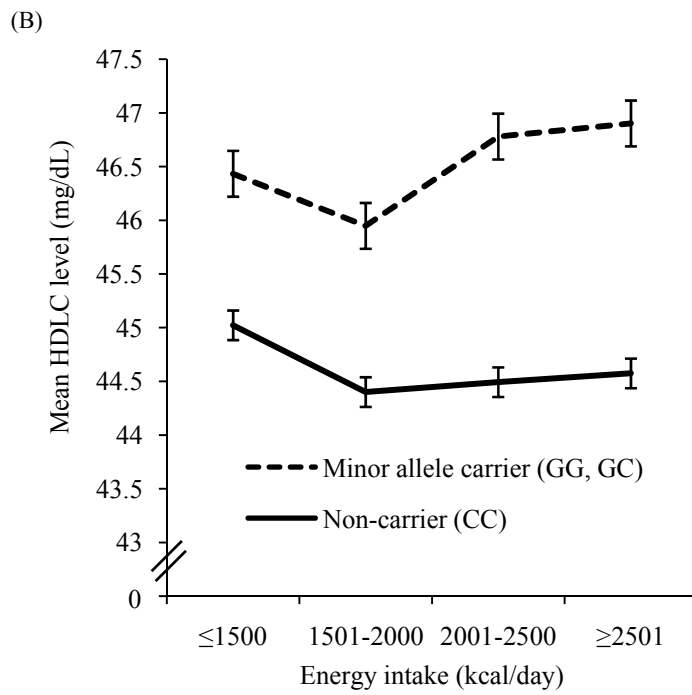

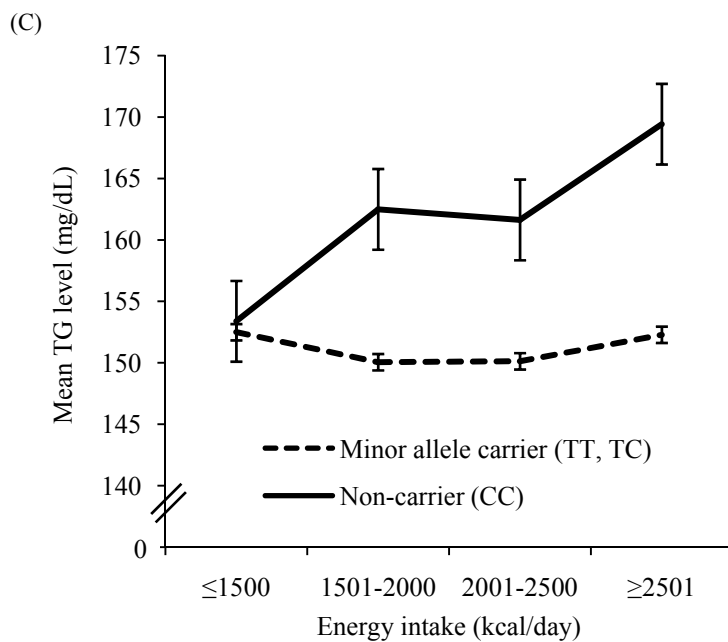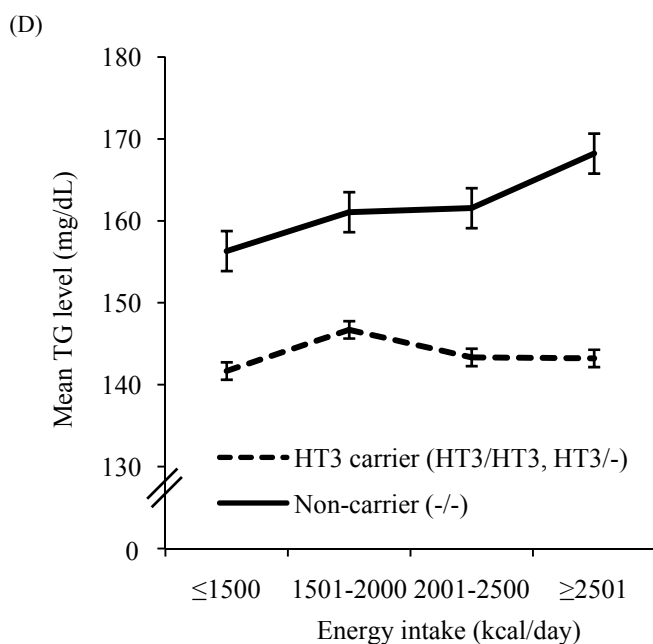

**Supplementary Fig. 3.** Interaction effects of lipoprotein lipase (*LPL*) single-nucleotide polymorphisms (SNPs) and haplotype with daily energy intake on lipid levels. Interaction p-values were calculated by linear regression analyses, which includes main and interaction effects, adjusted for residence area, age, gender and body mass index. (A) Interaction effect of *LPL* SNP, rs271 ( $r^2 = 0.99$  with rs263) with daily energy intake on high-density lipoprotein cholesterol (HDL) level ( $p = 0.013$ ). (B) Interaction effect of *LPL* SNP, rs328 ( $r^2 = 1$  with rs12679834) with daily energy intake on HDL level ( $p = 0.033$ ). (C) Interaction effect of *LPL* SNP, rs271 ( $r^2 = 0.99$  with rs263) with daily energy intake on triglyceride (TG) level ( $p = 0.021$ ). (D). Interaction effect of haplotype 3 in block 2 (TGTGTAGAGCTCCTCG) with daily energy intake on TG level ( $p = 0.027$ ). HT, haplotype.

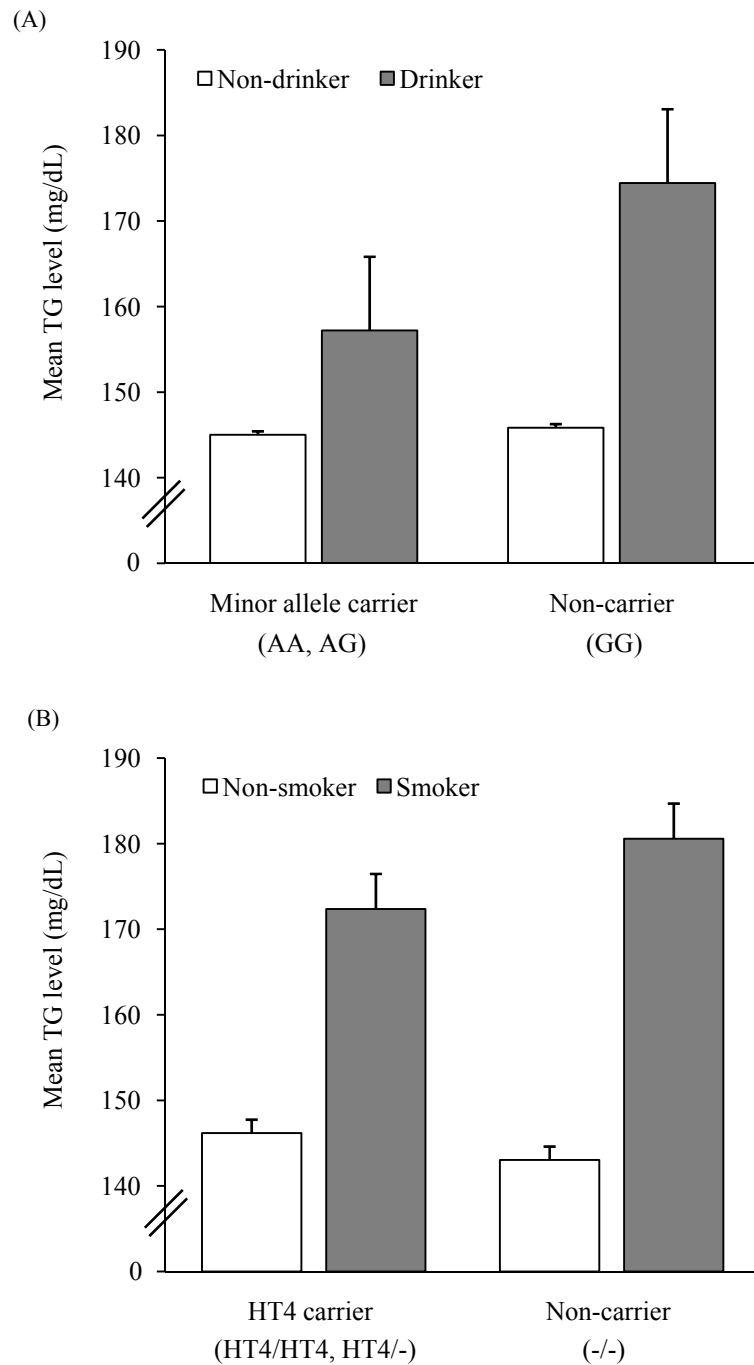

**Supplementary Fig. 4.** Interaction effect of lipoprotein lipase (*LPL*) single-nucleotide polymorphisms (SNP) and haplotype with lifestyle factors on triglyceride (TG) level. Interaction p-value was calculated by linear regression analysis, which includes main and interaction effects, adjusted for residence area, age, gender and body mass index. (A). Interaction effect of *LPL* SNP, rs263 ( $r^2 = 0.99$  with rs271) with alcohol consumption on TG level ( $p = 0.017$ ). (B). Interaction effect of haplotype 4 in block 2 (TAGAGGGAGCTCCTCG) with cigarette smoking on TG level ( $p = 0.022$ ). HT, haplotype.
